# Supplementary material for: A selective and easily recyclable dimer based on a calix[4]pyrrole derivative for the removal of mercury(ii) from water
Source: Royal Society of Chemistry journal article supplement (doi:10.1039/c9ra09911e), 2020-01-01
Supplement: c9ra09911e1.pdf [file c9ra09911e1.pdf]

## Supplementary information

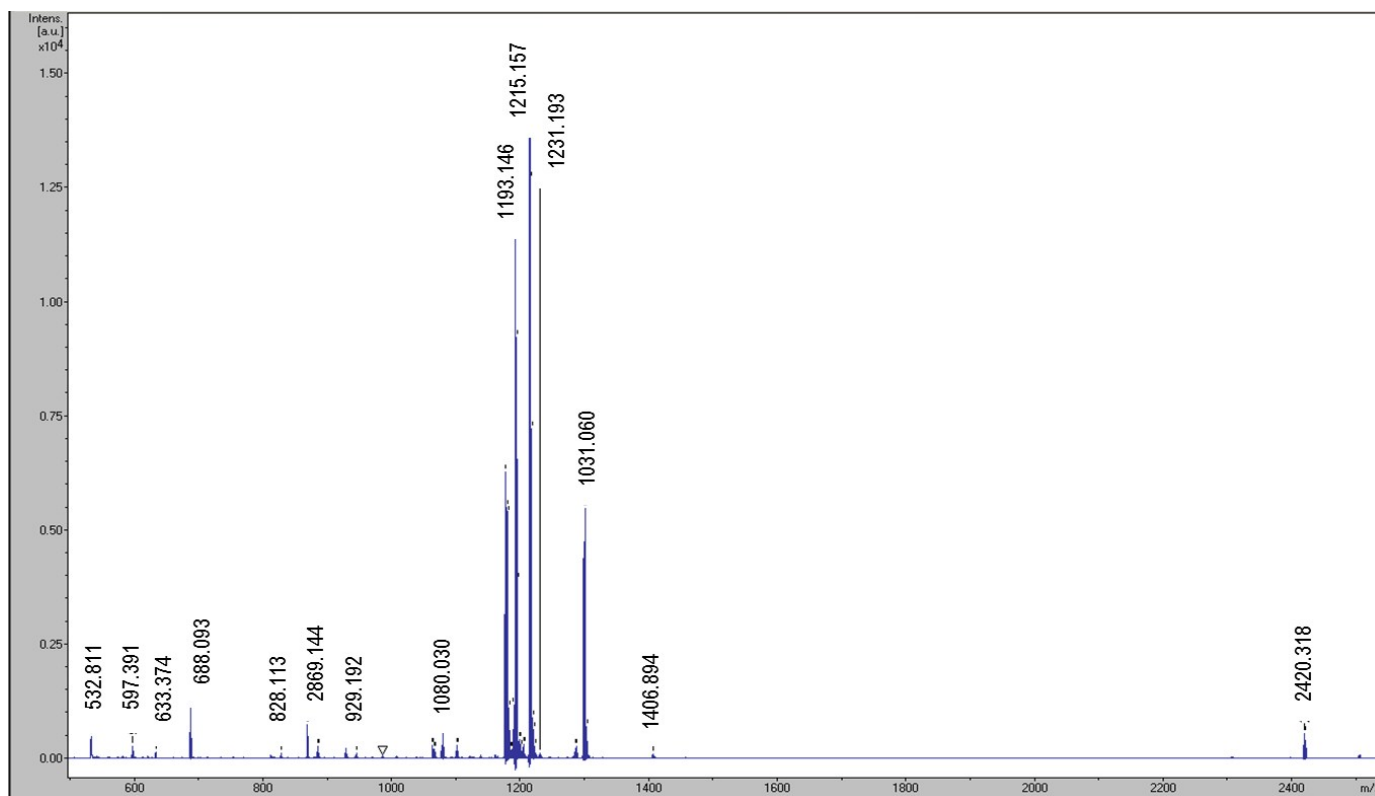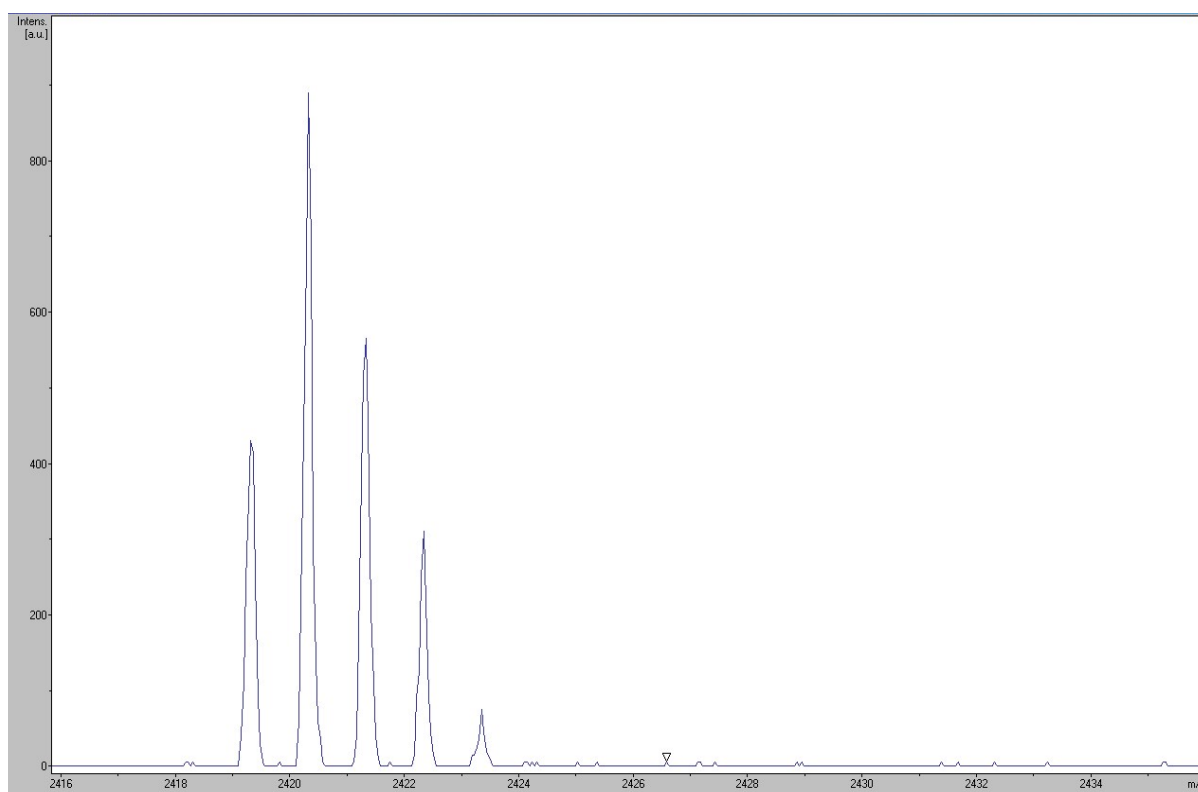

**Fig. S1.** Mass spectrum of the CPA dimer.

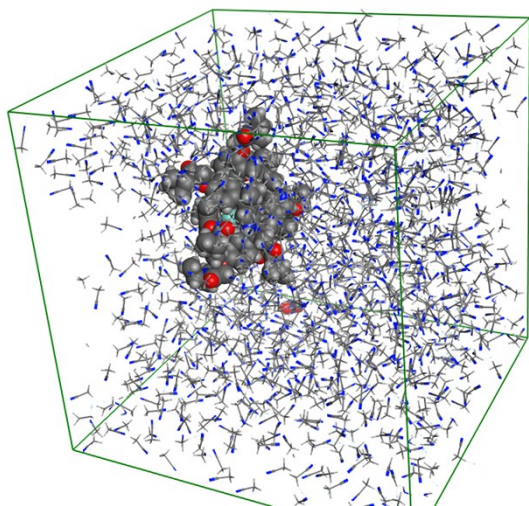

Hg (II) in contact with CPA dimer, NO<sub>3</sub> in solvent shell

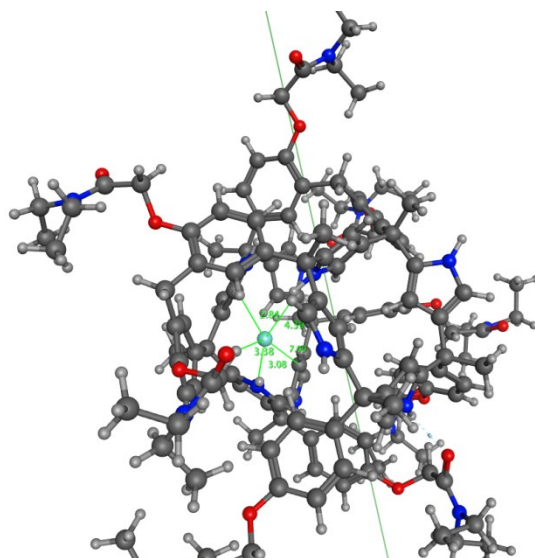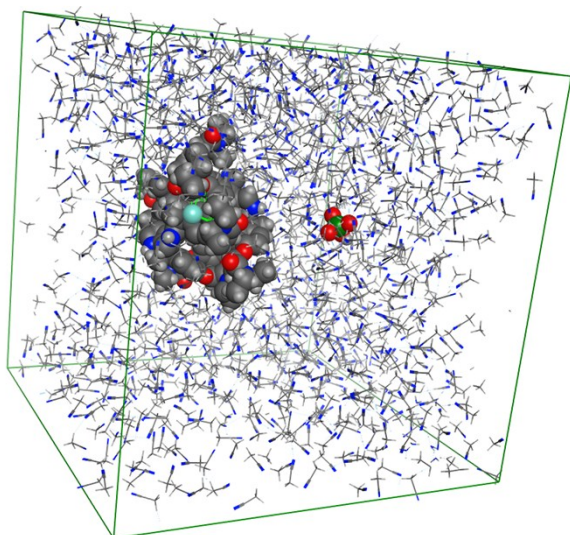

Hg (II) in contact with CPA dimer, ClO<sub>4</sub> in solvent shell

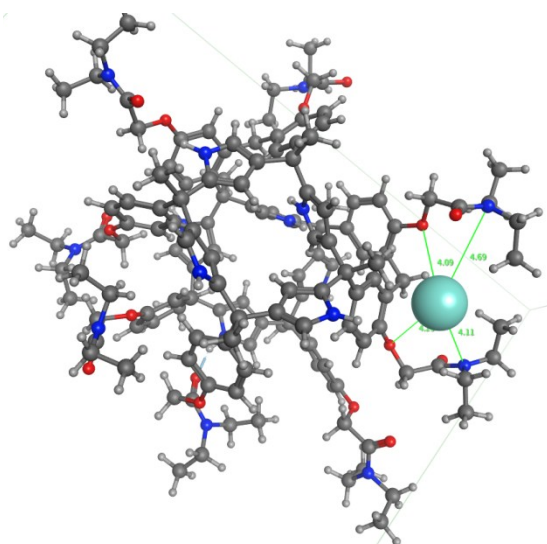

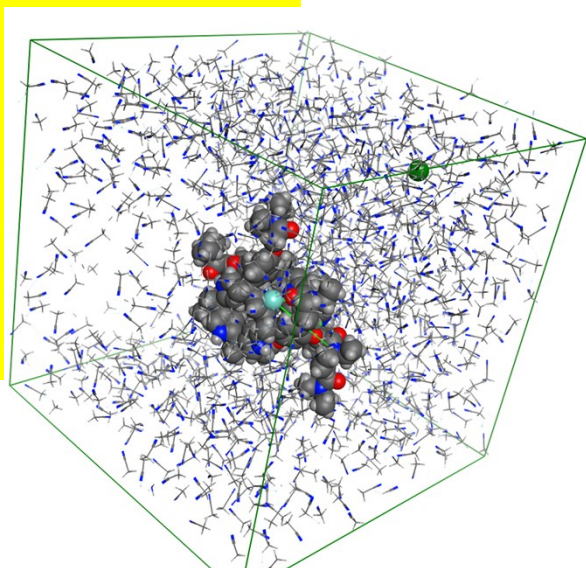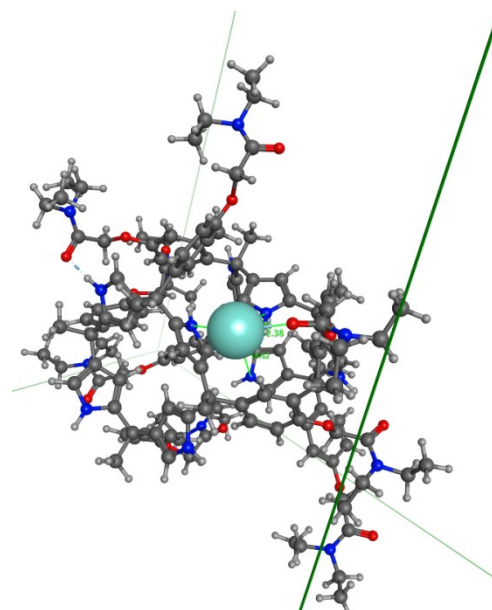

Hg (II) in contact with CPA dimer, Cl in solvent shell.

**Fig. S2.** Molecular Simulation dynamics of the dimer with Hg (II) involving different counter ions.
